# Supplementary material for: The HDAC inhibitor valproate induces a bivalent status of the CD20 promoter in CLL patients suggesting distinct epigenetic regulation of CD20 expression in CLL in vivo
Source: Oncotarget. 2017 Apr 8;8(23):37409–22. doi: 10.18632/oncotarget.16964 (PMC5514918; doi:10.18632/oncotarget.16964)
Supplement: Supplementary file 1 [file oncotarget-08-37409-s001.pdf]

## The HDAC inhibitor valproate induces a bivalent status of the CD20 promoter in CLL patients suggesting distinct epigenetic regulation of CD20 expression in CLL *in vivo*

### Supplementary Materials

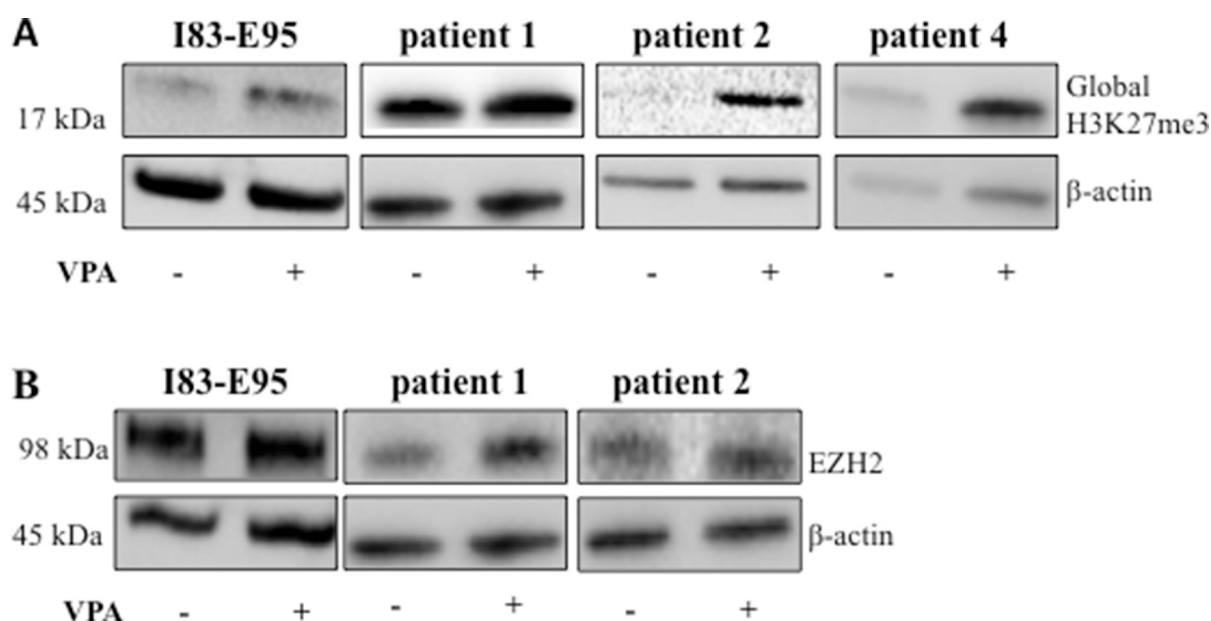

**Supplementary Figure 1: Global H3K27me3 and EZH2 protein is increased by valproate in CLL patients.** I83-E95 cells and circulating untreated CLL cells from patients were incubated with or without 1000  $\mu$ M of valproate. After 48 hours' total protein extracts were prepared and global H3K27me3 (A) and levels of EZH2 (B) protein were analysed by Western blot. One out of two independent experiments is shown. For experiment number 1, please see Figure 5 and Figure 6.

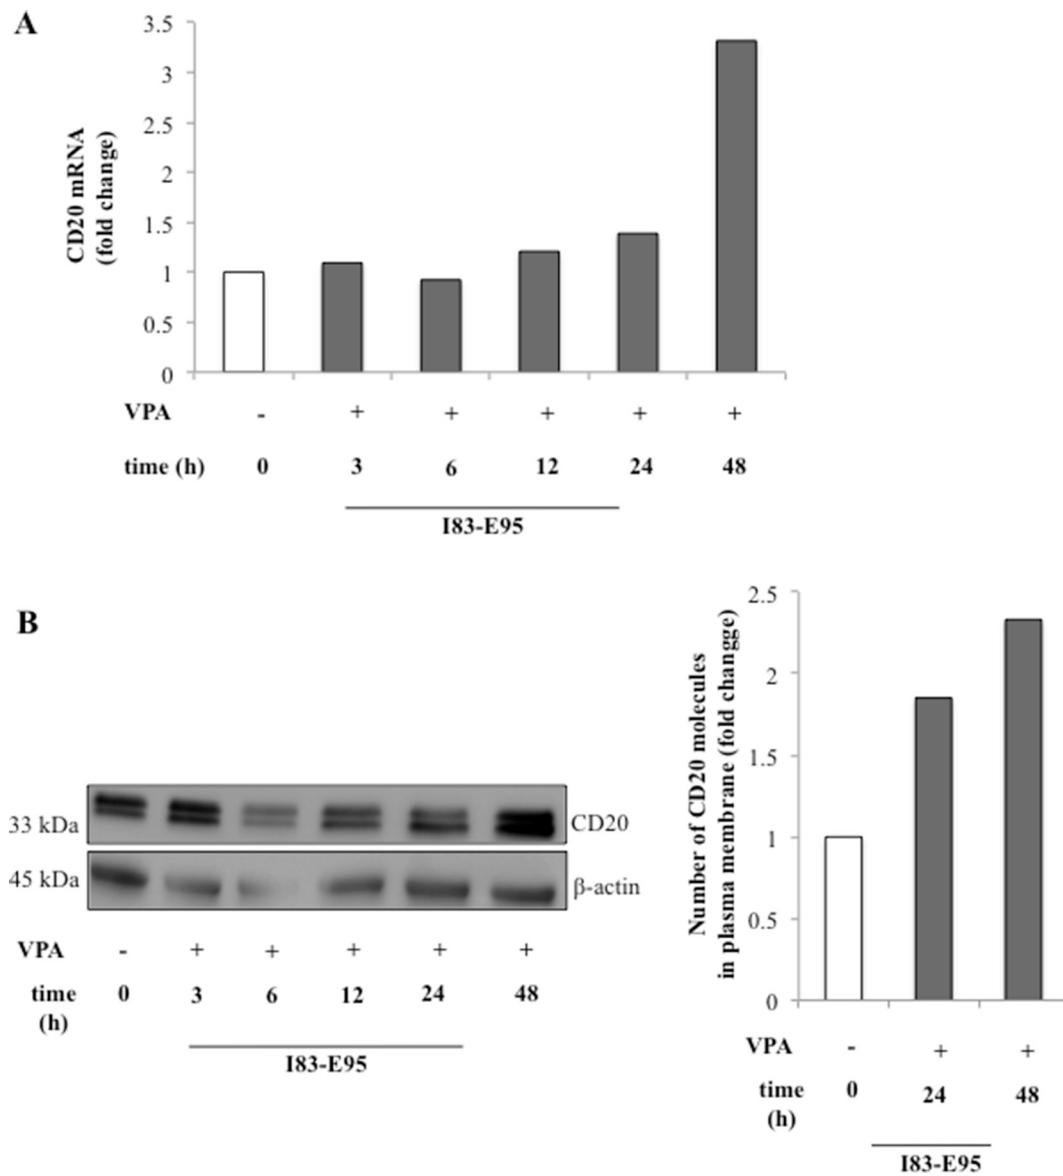

**Supplementary Figure 2: CD20 is maximally upregulated in I83-E95 cells after 48 hours in response to valproate.** I83-E95 cells were incubated with 1000  $\mu$ M of valproate and mRNA and total protein lysates were collected at the indicated time points and further analysed by qPCR (A) and Western blot (B, left). Fold induction of CD20 on the plasma membrane as measured by Quantibrite beads after 24 and 48 h of incubation with valproate was analysed by FACS (B, right).
